# Supplementary material
Source: PubMed Central journal article supplement (PMC1317977)

Tissue Samples:

- 1 bonemarrow
- 2 BM-CD71+EarlyErythroid
- 3 BM-CD34+
- 4 BM-CD105+Endothelial
- 5 PB-CD19+Bcells
- 6 PB-CD8+Tcells
- 7 PB-CD4+Tcells
- 8 PB-CD56+NKCells
- 9 PB-BDCA4+Dentritic\_Cells
- 10 PB-CD14+Monocytes
- 11 BM-CD33+Myeloid
- 12 WHOLEBLOOD
- 13 fetalliver
- 14 adrenalgland
- 15 Thyroid
- 16 fetalThyroid
- 17 fetallung
- 18 Pancreas
- 19 PancreaticIslets
- 20 salivarygland
- 21 AdrenalCortex
- 22 Ovary
- 23 skin
- 24 TrigeminalGanglion
- 25 SkeletalMuscle
- 26 UterusCorpus
- 27 TONGUE
- 28 Pituitary
- 29 PLACENTA
- 30 kidney
- 31 Liver
- 32 OlfactoryBulb
- 33 SuperiorCervicalGanglion
- 34 DRG
- 35 atrioventricularnode
- 36 ciliaryganglion
- 37 Appendix
- 38 trachea
- 39 Uterus
- 40 Prostate
- 41 Heart
- 42 Lung
- 43 lymphnode
- 44 Tonsil
- 45 thymus
- 46 TemporalLobe
- 47 globuspallidus
- 48 Amygdala
- 49 PrefrontalCortex
- 50 OccipitalLobe
- 51 subthalamcnucleus
- 52 CingulateCortex
- 53 Pons
- 54 fetalbrain
- 55 MedullaOblongata
- 56 ParietalLobe
- 57 caudatenucleus
- 58 cerebellum
- 59 CerebellumPeduncles
- 60 WholeBrain
- 61 Hypothalamus
- 62 Thalamus
- 63 spinalcord
- 64 testis
- 65 TestisGermCell
- 66 TestisSeminiferousTubule
- 67 TestisInterstitial
- 68 TestisLeydigCell
- 69 CardiacMyocytes
- 70 SmoothMuscle
- 71 ADIPOCYTE
- 72 bronchialepithelialcells

CTWC Clustering Output

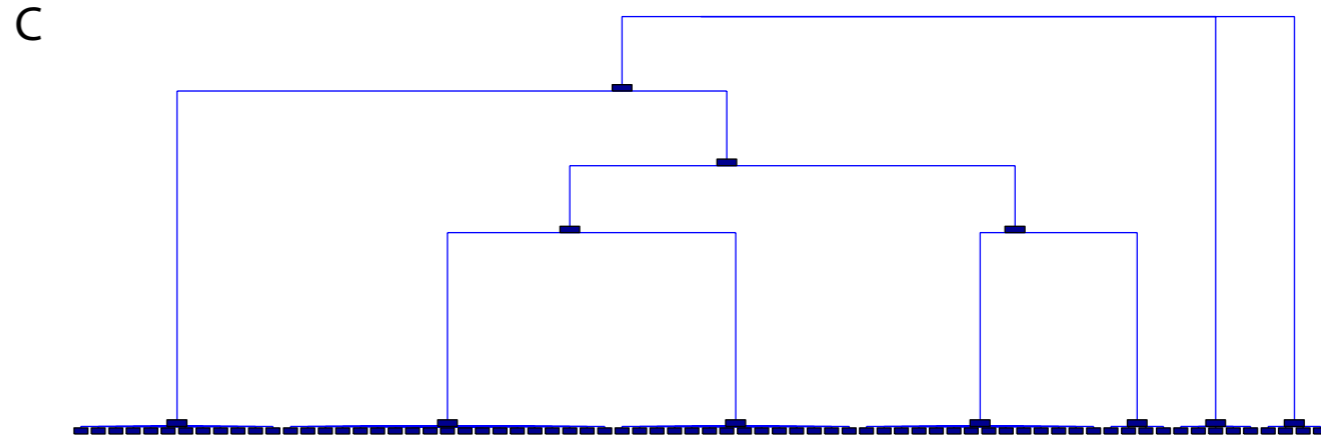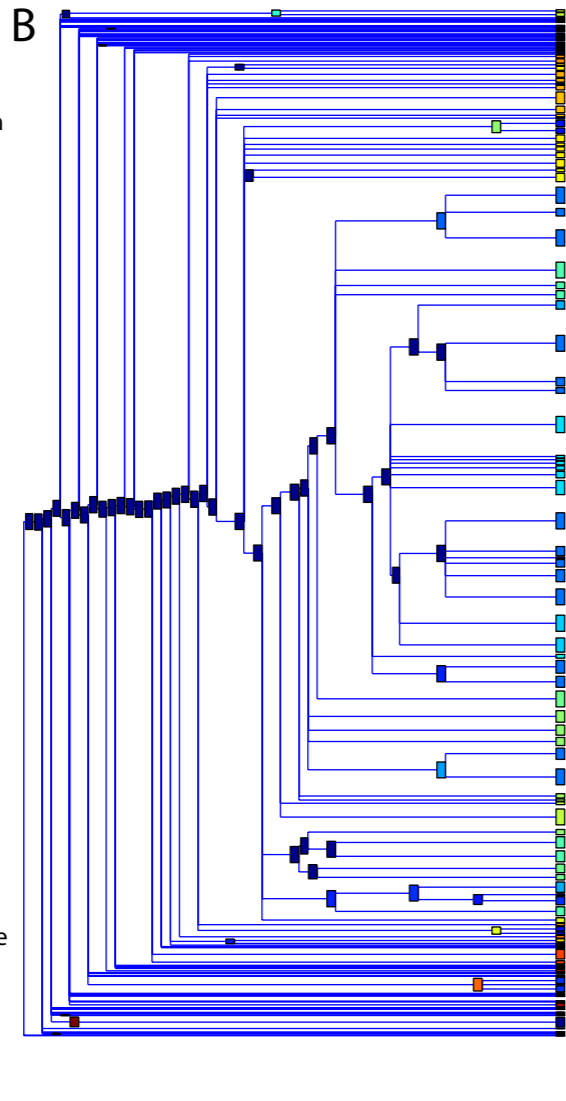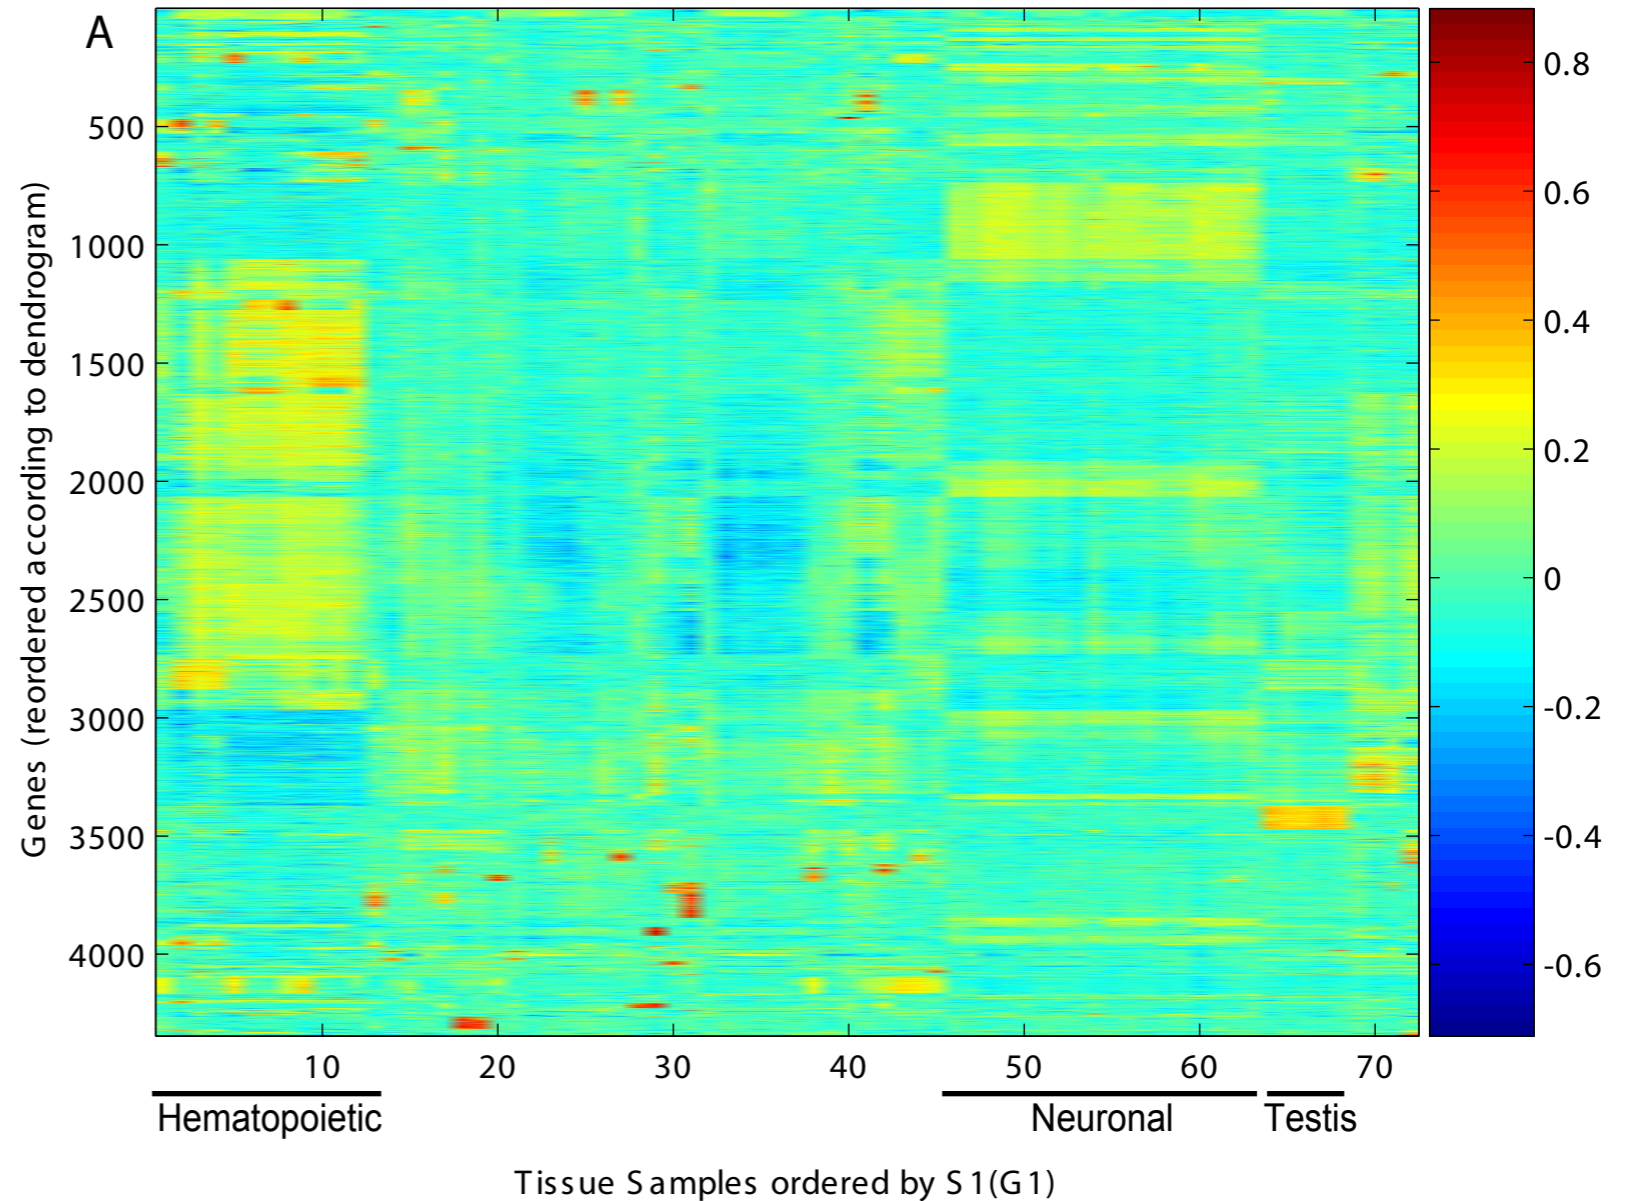

Supplement: pnas_0509360102_1.pdf [file pnas_0509360102_1.pdf]
